# Supplementary material for: Electronic structure and thermoelectric properties of full Heusler compounds Ca2YZ (Y = Au, Hg; Z = As, Sb, Bi, Sn and Pb)
Source: Royal Society of Chemistry journal article supplement (doi:10.1039/d0ra04984k), 2020-01-01
Supplement: d0ra04984k1.pdf [file d0ra04984k1.pdf]

Supplementary Materials for

**Electronic Structure and Thermoelectric Properties of Full  
Heusler Compounds  $\text{Ca}_2YZ$  ( $Y = \text{Au, Hg}$ ;  $Z = \text{As, Sb, Bi, Sn}$  and  
**Pb**)**

Yang Hu<sup>1</sup>, Yurong Jin<sup>1,3</sup>, Guangbiao Zhang<sup>1,2</sup>, Yuli Yan<sup>1,2\*</sup>

*<sup>1</sup>Institute for Computational Materials Science,*

*School of Physics and Electronics, Henan University,*

*Kaifeng 475004, China; <sup>2</sup>International Joint Research Laboratory*

*of New Energy Materials and Devices of Henan Province,*

*China; <sup>3</sup>Chongqing Institute of Engineering, Chongqing 402360, China*

(Dated: July 20, 2020)

## Introduction

To determine the phase stability, we calculated the phonon dispersion using phonopy [1] and forces from vasp [2] in the frozen phonon approximation with  $2\times 2\times 2$  supercell. Phonon dispersion of  $\text{Ca}_2YZ$  ( $Y = \text{Au, Hg}$ ;  $Z = \text{As, Sb, Bi, Sn}$  and  $\text{Pb}$ ) along the high-symmetry direction is shown in Fig.S1. From this figure we can see that the calculated phonon spectra have no imaginary frequency, which indicates that  $\text{Ca}_2YZ$  ( $Y = \text{Au, Hg}$ ;  $Z = \text{As, Sb, Bi, Sn}$  and  $\text{Pb}$ ) are stable thermodynamically.

- 
- [1] Togo, A. Tanaka, I. First principles phonon calculations in materials science. *Scr. Mater.* **108**, 15 (2015).
- [2] D. M. Ceperley and B. Alder, Ground state of the electron gas by a stochastic method, *Phys.Rev.Lett.* **45**, 566 (1980).

Table.S I: Total free energy of a f.u.  $\text{Ca}_2YZ$  ( $Y = \text{Au, Hg}$ ;  $Z = \text{As, Sb, Bi, Sn}$  and  $\text{Pb}$ ).

| Comp.                    | Eg(eV)/f.u. (L21) | Eg(eV)/f.u. (XA) |
|--------------------------|-------------------|------------------|
| $\text{Ca}_2\text{AuAs}$ | -15.6702          | -13.3465         |
| $\text{Ca}_2\text{AuSb}$ | -14.9002          | -7.56019         |
| $\text{Ca}_2\text{AuBi}$ | -14.2891          | -12.456          |
| $\text{Ca}_2\text{HgSn}$ | -10.5097          | -8.9281          |
| $\text{Ca}_2\text{HgPb}$ | -9.9781           | -8.5392          |

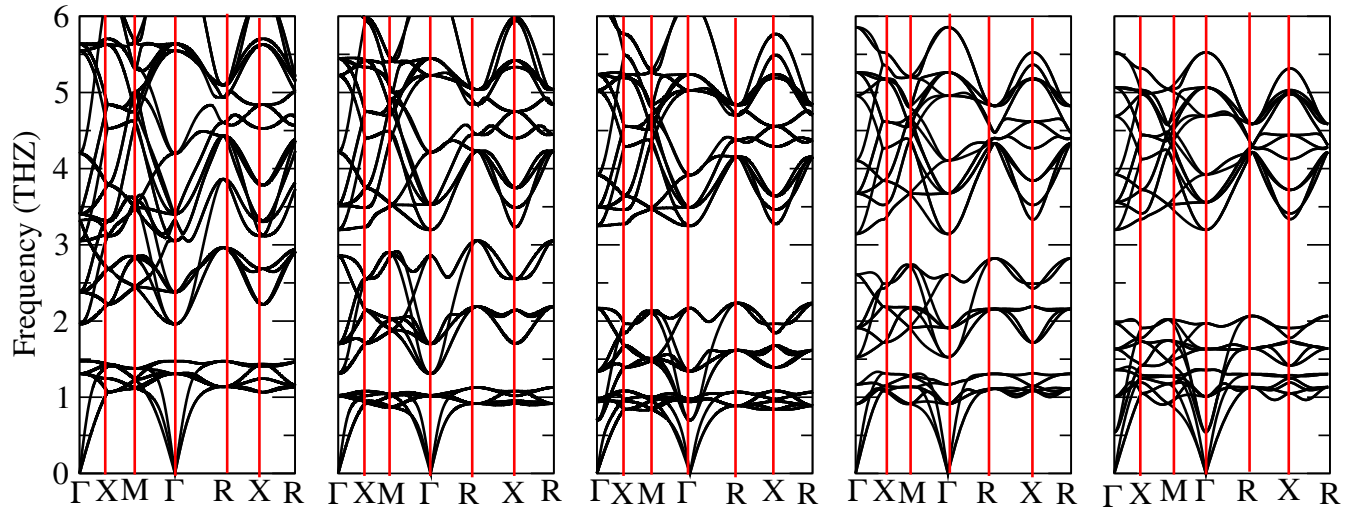

Fig.S 1: Phonon dispersion of  $\text{Ca}_2YZ$  ( $Y = \text{Au, Hg}$ ;  $Z = \text{As, Sb, Bi, Sn}$  and  $\text{Pb}$ ).
